# Supplementary material for: Effect of Cranberry Extract on the Frequency of Bacteriuria in Dogs with Acute Thoracolumbar Disk Herniation: A Randomized Controlled Clinical Trial
Source: PubMed Central journal article supplement — J Vet Intern Med. 2016 Dec 3;31(1):60–8. doi: 10.1111/jvim.14613 (PMC5259620; doi:10.1111/jvim.14613), 2016-12-03
Supplement: JVIM-31-60-s001.pdf [file JVIM-31-60-s001.pdf]

## **Effect of Cranberry Extract on Myelopathy-Associated Urinary Tract Infections**

### **Client Take- Home Questionnaire**

Patient Name: \_\_\_\_\_

Patient ID:

Follow up visit number:

You will complete one of these forms at home for each follow-up visit. These forms will ask a series of questions about your dog's recovery, primarily asking you to note the date on which you first see a specific action. If, by the time of your scheduled recheck, you have not seen the action a question inquires about, please note this in the available space. If you have already answered any question with the date you first noticed an action on a previous questionnaire, please enter N/A. You may include comments about how you feel your dog is progressing for each question if you wish. If you should misplace your forms, or if you have any questions about this form or the study in general, please email [ivddstudy@lists.ncsu.edu](mailto:ivddstudy@lists.ncsu.edu).

1. On what date did you note that your dog began to wag his tail? Do not include movement noted during or immediately after defecation or direct stimulation of the tail. If you are able, describe the circumstances under which you noted movement (i.e. you called his name, he saw someone he knows, etc.).
  
2. On what date did your dog begin voluntarily urinating a noticeable consistent stream of urine?
  
3. If you have been manually expressing or catheterizing your dog's bladder, on what date were you able to stop?

4. Have you noticed that your dog's urine has a bad odor, contains blood, or that your dog has an increased frequency of urination or pain on urination in the last 2 weeks?
  
5. Has your dog suffered from any incontinence (involuntary urine leakage) in the last 2 weeks? If so, when is it occurring?
  
6. Has your dog had a urinary tract infection diagnosed and treated by your local veterinarian since we last saw you? If yes, what were the culture results and what antibiotics have they been treated with?
  
7. On what date did you first note that your dog began to move his hind limbs?
  
8. On what date did you first note that your dog was able to stand unassisted?
  
9. On what date did you note that your dog began to take steps when supported to stand?
  
10. On what date did you note that your dog began to take steps when unsupported?
