# Supplementary material for: Effect of Cranberry Extract on the Frequency of Bacteriuria in Dogs with Acute Thoracolumbar Disk Herniation: A Randomized Controlled Clinical Trial
Source: PubMed Central journal article supplement — J Vet Intern Med. 2016 Dec 3;31(1):60–8. doi: 10.1111/jvim.14613 (PMC5259620; doi:10.1111/jvim.14613), 2016-12-03
Supplement: JVIM-31-60-s003.pdf [file JVIM-31-60-s003.pdf]

| Variable                            | Bacteriuria |         |
|-------------------------------------|-------------|---------|
|                                     | N           | p-value |
| Sex                                 | 94          | 0.0023* |
| Initial Neurological Status         | 70          | 0.0694  |
| Gait Score (48 hours)               | 63          | 0.8816  |
| Gait Score (2 weeks)                | 63          | 0.9231  |
| Gait Score (4 weeks)                | 63          | 0.1511  |
| Gait Score (6 weeks)                | 63          | 0.5261  |
| Duration Non-Ambulatory (FE)        | 70          | 0.8706  |
| Duration Lack of Urination          | 55          | 0.0883  |
| Catheter (Y/N)                      | 79          | 1.0000  |
| Urine Status V/I (48 hours) (ChiSq) | 88          | 0.0293* |
| Urine Status V/I (2 weeks) (FE)     | 92          | 0.1027  |
| Urine Status V/I (4 weeks) (FE)     | 83          | 0.0248* |
| Urine Status V/I (6 weeks) (FE)     | 81          | 0.1347  |
| UA Crystalluria Y/N (48 hours)      | 71          | 0.6402  |
| UA Crystalluria Y/N (2 weeks YN)    | 71          | 0.0813  |
| UA Crystalluria Y/N (4 weeks YN)    | 71          | 0.1993  |
| UA Crystalluria Y/N (6 weeks YN)    | 71          | 0.6957  |

### Supplementary Data 3

Investigation of different parameters potentially associated with bacteriuria. A logistic regression was performed to fit these parameters and a Chi-squared test or Fishers exact test was used to evaluate categorical parameters. Animals with any missing data for a particular parameter were excluded from the analysis of that parameter. N: number of observations, FE: Fisher's Exact test; ChiSq: Chi-squared test; Y/N: yes/no; V/I: voluntary/involuntary. If  $p < 0.05$  is considered significant, sex, and urine status at 48 hours and 2 weeks are significant risk factors for bacteriuria. Using a corrected p-value of 0.0028 in light of the multiple comparisons, sex remains a significant risk factor.
